# Supplementary material
Source: PubMed Central journal article supplement (PMC6909720)
Supplement: Supp_Table1.pdf [file Supp_Table1.pdf]

**Supplementary Table S1. All High Probability Off-Target Effects in Promoter Regions from Designed gRNA Templates**

| Sample      | Position | gRNA template         | In exon | In intron | Gene      | In promoter | Promoters | UCSC coordinates          | CFD score | Mismatches | gRNA efficacy |
|-------------|----------|-----------------------|---------|-----------|-----------|-------------|-----------|---------------------------|-----------|------------|---------------|
| O-AY623602  | 42       | AGAAATCCCTGGATCTTTGGG |         |           |           |             |           | chr12:57446538-57446560   | 0.871     | 3          | 0.585         |
| O-AY623602  | 42       | AGAAATCCCTGGATCTTTGGG | TRUE    |           | SCCPDH    |             |           | chr1:246920083-246920105  | 0.813     | 4          | 0.703         |
| O-AB485669  | 42       | AGAGATCCCTGGATCTTTGGA |         |           |           |             |           | chr12:57446538-57446560   | 0.836     | 3          | 0.585         |
| O-AB485669  | 42       | AGAGATCCCTGGATCTTTGGA | TRUE    |           | SCCPDH    |             |           | chr1:246920083-246920105  | 0.780     | 4          | 0.703         |
| O-AB485669  | 42       | AGAGATCCCTGGATCTTTGGA | TRUE    |           | ZPLDI     |             |           | chr3:102047288-102047310  | 0.722     | 2          | 0.788         |
| O-KU168297  | 42       | AGAGATCCCTGGATCTTTGGG |         |           |           |             |           | chr12:57446538-57446560   | 0.783     | 4          | 0.585         |
| C-KC156213  | 42       | AGACATCCCTGATTTGTGGG  |         |           |           |             |           | chr12:108226404-108226426 | 0.844     | 4          | 0.642         |
| O-KU168282  | 40       | GCAGAAATCCCTGGATCTCTG | TRUE    |           | ITGA9     |             |           | chr3:37542153-37542175    | 0.754     | 4          | 0.605         |
| A1-AB287379 | 77       | GCTACTTCCCTGATTTGGCAG |         |           |           |             |           | chr5:20768095-20768117    | 0.799     | 4          | 0.862         |
| A1-AB287379 | 77       | GCTACTTCCCTGATTTGGCAG | TRUE    |           | MYLK4     |             |           | chr5:34093603-34093625    | 0.799     | 4          | 0.862         |
| A1-AB287379 | 78       | CTACTTCCCTGATTTGGCAGA |         |           |           |             |           | chr6:27068888-2706910     | 0.875     | 2          | 0.563         |
| B-HM469982  | 77       | GCTACTTCCCTGATTTGGCAG | TRUE    |           | MYLK4     |             |           | chr5:20768095-20768117    | 0.799     | 4          | 0.862         |
| B-HM469982  | 77       | GCTACTTCCCTGATTTGGCAG | TRUE    |           | MYLK4     |             |           | chr5:34093603-34093625    | 0.799     | 4          | 0.862         |
| B-HM469982  | 78       | CTACTTCCCTGATTTGGCAGA | TRUE    |           | AUTS2     |             |           | chr6:27068888-2706910     | 0.875     | 2          | 0.563         |
| G-KU168277  | 78       | ATTCTTCCAGATTTGGCAGA  | TRUE    |           | MYLK4     |             |           | chr7:69465760-69465782    | 0.714     | 4          | 0.573         |
| A1-AB253429 | 77       | GCTACTTCCCTGATTTGGCAG | TRUE    |           | AUTS2     |             |           | chr5:20768095-20768117    | 0.799     | 4          | 0.862         |
| A1-AB253429 | 77       | GCTACTTCCCTGATTTGGCAG | TRUE    |           | MYLK4     |             |           | chr5:34093603-34093625    | 0.799     | 4          | 0.862         |
| A1-AB253429 | 78       | CTACTTCCCTGATTTGGCAGA | TRUE    |           | MYLK4     |             |           | chr6:27068888-2706910     | 0.875     | 2          | 0.563         |
| B-EF363127  | 78       | CTACTTCCCTGATTTGGCAAA |         |           |           |             |           | chrX:31060581-31060603    | 0.711     | 3          | 0.522         |
| C-AB485645  | 78       | CTACTTCCCTGATTTGGCAAA |         |           |           |             |           | chrX:31060581-31060603    | 0.711     | 3          | 0.522         |
| D-JX236679  | 78       | CTACTTCCCTGATTTGGCAAA | TRUE    |           | MYLK4     |             |           | chrX:31060581-31060603    | 0.711     | 3          | 0.522         |
| G-AF196748  | 78       | ATACTTCCAGATTTGGCAGA  | TRUE    |           | MYLK4     |             |           | chr6:27068888-2706910     | 0.772     | 3          | 0.563         |
| A1-AB485632 | 77       | GCTACTTCCCTGATTTGGCAG |         |           |           |             |           | chr5:20768095-20768117    | 0.799     | 4          | 0.862         |
| A1-AB485632 | 77       | GCTACTTCCCTGATTTGGCAG | TRUE    |           | MYLK4     |             |           | chr5:34093603-34093625    | 0.799     | 4          | 0.862         |
| A1-AB485632 | 78       | CTACTTCCCTGATTTGGCAGA | TRUE    |           | MYLK4     |             |           | chr6:27068888-2706910     | 0.875     | 2          | 0.563         |
| B-AB604947  | 77       | GCTACTTCCCTGATTTGGCAG |         |           |           |             |           | chr5:20768095-20768117    | 0.799     | 4          | 0.862         |
| B-AB604947  | 77       | GCTACTTCCCTGATTTGGCAG | TRUE    |           | MYLK4     |             |           | chr5:34093603-34093625    | 0.799     | 4          | 0.862         |
| B-AB604947  | 78       | CTACTTCCCTGATTTGGCAGA | TRUE    |           | MYLK4     |             |           | chr6:27068888-2706910     | 0.875     | 2          | 0.563         |
| D-KU168272  | 78       | TTACTTCCCTGATTTGGCAAA |         |           |           |             |           | chrX:31060581-31060603    | 0.711     | 3          | 0.522         |
| G-KU168302  | 78       | ATTCTTCCAGATTTGGCAGA  | TRUE    |           | AUTS2     |             |           | chr7:69465760-69465782    | 0.714     | 4          | 0.573         |
| A1-AF196742 | 77       | GCTACTTCCCTGATTTGGCAG |         |           |           |             |           | chr5:20768095-20768117    | 0.799     | 4          | 0.862         |
| A1-AF196742 | 77       | GCTACTTCCCTGATTTGGCAG | TRUE    |           | MYLK4     |             |           | chr5:34093603-34093625    | 0.799     | 4          | 0.862         |
| A1-AF196742 | 78       | CTACTTCCCTGATTTGGCAGA | TRUE    |           | MYLK4     |             |           | chr6:27068888-2706910     | 0.875     | 2          | 0.563         |
| B-GQ386793  | 77       | GCTACTTCCCTGATTTGGCAG |         |           |           |             |           | chr5:20768095-20768117    | 0.799     | 4          | 0.862         |
| B-GQ386793  | 77       | GCTACTTCCCTGATTTGGCAG | TRUE    |           | MYLK4     |             |           | chr5:34093603-34093625    | 0.799     | 4          | 0.862         |
| B-GQ386793  | 78       | CTACTTCCCTGATTTGGCAGA | TRUE    |           | MYLK4     |             |           | chr6:27068888-2706910     | 0.875     | 2          | 0.563         |
| D-JX236668  | 78       | CTACTTCCCTGATTTGGCAAA |         |           |           |             |           | chrX:31060581-31060603    | 0.711     | 3          | 0.522         |
| G-AB287004  | 78       | ATTCTTCCAGATTTGGCAGA  | TRUE    |           | AUTS2     |             |           | chr7:69465760-69465782    | 0.714     | 4          | 0.573         |
| B-AB731663  | 77       | GCTACTTCCCTGATTTGGCAG |         |           |           |             |           | chr5:20768095-20768117    | 0.799     | 4          | 0.862         |
| B-AB731663  | 77       | GCTACTTCCCTGATTTGGCAG | TRUE    |           | AUTS2     |             |           | chr5:34093603-34093625    | 0.799     | 4          | 0.862         |
| B-AB731663  | 78       | CTACTTCCCTGATTTGGCAGA | TRUE    |           | MYLK4     |             |           | chr6:27068888-2706910     | 0.875     | 2          | 0.563         |
| G-AF196747  | 78       | ATTCTTCCAGATTTGGCAGA  | TRUE    |           | AUTS2     |             |           | chr7:69465760-69465782    | 0.714     | 4          | 0.573         |
| A1-AB287379 | 95       | AGAAATACACACAGGCCA    | TRUE    |           | LINC00861 |             |           | chr8:126962194-126962216  | 0.875     | 2          | 0.514         |
| A1-AB287379 | 97       | AAATTACACACAGGCCAGG   |         |           |           |             |           | chr9:34356238-34356260    | 0.807     | 4          | 0.538         |

(continued)

Supplementary Table S1. (Continued)

| Sample      | Position | gRNA template         | In exon | In intron | Gene         | In promoter | Promoters | UCSC coordinates         | CFD score | Mismatches | gRNA efficacy |
|-------------|----------|-----------------------|---------|-----------|--------------|-------------|-----------|--------------------------|-----------|------------|---------------|
| A1-AB287379 | 105      | ACCAGGCCACGGAAATCAGAT | TRUE    |           | VANGL2       |             |           | chr1:160370369-160370391 | 0.758     | 4          | 0.624         |
| C-AF196733  | 97       | AATTACACACCGGGACCCAGG |         |           |              |             |           | chr9:34356238-34356260   | 0.800     | 4          | 0.538         |
| D-AB485651  | 94       | GCAAAACACTACAGGGCCAGG | TRUE    |           | EPS8         |             |           | chr12:15794978-15795000  | 0.746     | 4          | 0.629         |
| D-AB485651  | 105      | ACAGGGCCAGGGATTAGATA  |         |           |              |             |           | chr8:57160913-57160935   | 0.708     | 4          | 0.756         |
| D-AB485651  | 112      | CCAGGGATTAGATATCCACT  |         |           |              |             |           | chr4:55887307-55887329   | 0.788     | 4          | 0.788         |
| G-KUI168277 | 95       | AAATTACACACACAGGGCCCA |         | TRUE      | LINC00861    |             |           | chr8:126962194-126962216 | 0.875     | 2          | 0.514         |
| G-KUI168277 | 97       | GAATTACACACAGGGCCCAAG |         |           |              |             |           | chr9:34356238-34356260   | 0.807     | 4          | 0.538         |
| O-XY623602  | 104      | CACAGGACACAGGAACCCAGG |         | TRUE      | LINC00861    |             |           | chr8:103757690-103757712 | 0.783     | 3          | 0.559         |
| A1-AB253429 | 95       | AGAAATTACACACAGGGCCCA |         | TRUE      | LINC00861    |             |           | chr8:126962194-126962216 | 0.875     | 2          | 0.514         |
| A1-AB253429 | 97       | AATTACACACAGGGCCCAAG  |         |           |              |             |           | chrX:87503599-87503621   | 0.929     | 1          | 0.582         |
| A1-AB253429 | 97       | AATTACACACAGGGCCCAAG  |         |           |              |             |           | chr10:19237281-19237303  | 0.824     | 2          | 0.535         |
| A1-AB253429 | 97       | AATTACACACAGGGCCCAAG  |         |           |              |             |           | chr2:107868897-107868919 | 0.807     | 3          | 0.547         |
| A1-AB253429 | 97       | AATTACACACAGGGCCCAAG  |         |           |              |             |           | chr12:49536199-49536221  | 0.706     | 4          | 0.667         |
| G-AF196748  | 95       | AGAAATTACACATCAGGACCA | TRUE    |           | SETDB1       |             |           | chr1:150904508-150904530 | 0.824     | 2          | 0.514         |
| A1-AB485632 | 95       | AGAAATTACACACAGGGCCCA | TRUE    |           | LINC00861    |             |           | chr8:126962194-126962216 | 0.875     | 2          | 0.514         |
| A1-AB485632 | 97       | AATTACACACAGGGCCCAAG  |         |           |              |             |           | chr9:34356238-34356260   | 0.807     | 4          | 0.538         |
| G-KUI168302 | 110      | GGCCAGGGACTAGACTCCCA  |         | TRUE      | SGCD         |             |           | chr5:174135570-174135592 | 0.923     | 2          | 0.649         |
| A1-AF196742 | 112      | CCAGGGCCAGATTCCCGCT   |         | TRUE      |              |             |           | chr5:155517179-155517201 | 0.750     | 3          | 0.763         |
| A1-AF196742 | 97       | AATTACACACAGGACCCAGG  |         |           |              |             |           | chr9:34356238-34356260   | 0.857     | 4          | 0.538         |
| A1-AF196742 | 103      | ACACAGGACCCAGGGCCCAAG | TRUE    |           | NTSR1        |             |           | chr20:61393217-61393239  | 0.867     | 3          | 0.617         |
| A1-AF196742 | 103      | ACACAGGACCCAGGGCCCAAG |         |           |              |             |           | chr6:94887281-94887303   | 0.706     | 4          | 0.574         |
| A1-AF196742 | 110      | GACAGGGCCAGATTCCCGCT  | TRUE    |           | SNORD109B    |             |           | chr15:25424827-25424849  | 0.725     | 4          | 0.765         |
| C-KCI156124 | 112      | CCAGGGTTCAGATTCCCGCT  | TRUE    |           | FAM90A1      |             |           | chr12:8374111-83741133   | 0.721     | 3          | 0.914         |
| C-KCI156124 | 112      | CCAGGGTTCAGATTCCCGCT  |         |           |              |             |           | chr4:9178179-9178201     | 0.721     | 3          | 0.914         |
| C-KCI156124 | 112      | CCAGGGTTCAGATTCCCGCT  |         | TRUE      | LOC100506990 |             |           | chr8:12029963-12029985   | 0.721     | 3          | 0.914         |
| C-KCI156124 | 112      | CCAGGGTTCAGATTCCCGCT  | TRUE    |           | FAM90A25P    |             |           | chr8:12272282-12272304   | 0.721     | 3          | 0.914         |
| C-KCI156124 | 112      | CCAGGGTTCAGATTCCCGCT  |         |           |              |             |           | chr8:7117721-7117743     | 0.721     | 3          | 0.914         |
| C-KCI156124 | 112      | CCAGGGTTCAGATTCCCGCT  |         |           |              |             |           | chr8:7125343-7125365     | 0.721     | 3          | 0.914         |
| C-KCI156124 | 112      | CCAGGGTTCAGATTCCCGCT  |         |           |              |             |           | chr8:7132965-7132987     | 0.721     | 3          | 0.914         |
| C-KCI156124 | 112      | CCAGGGTTCAGATTCCCGCT  |         |           |              |             |           | chr8:7140587-7140609     | 0.721     | 3          | 0.914         |
| C-KCI156124 | 112      | CCAGGGTTCAGATTCCCGCT  |         |           |              |             |           | chr8:7148209-7148231     | 0.721     | 3          | 0.914         |
| C-KCI156124 | 112      | CCAGGGTTCAGATTCCCGCT  | TRUE    |           | FAM66B       |             |           | chr8:7406270-7406292     | 0.721     | 3          | 0.914         |
| C-KCI156124 | 112      | CCAGGGTTCAGATTCCCGCT  |         | TRUE      |              |             |           | chr8:7413915-7413937     | 0.721     | 3          | 0.914         |
| C-KCI156124 | 112      | CCAGGGTTCAGATTCCCGCT  | TRUE    |           | FAM90A7P     |             |           | chr8:7421565-7421587     | 0.721     | 3          | 0.914         |
| C-KCI156124 | 112      | CCAGGGTTCAGATTCCCGCT  | TRUE    |           | FAM90A7P     |             |           | chr8:7429210-7429232     | 0.721     | 3          | 0.914         |
| C-KCI156124 | 112      | CCAGGGTTCAGATTCCCGCT  |         | TRUE      |              | DEFB103B_1  |           | chr8:7436859-7436881     | 0.721     | 3          | 0.914         |
| C-KCI156124 | 112      | CCAGGGTTCAGATTCCCGCT  |         |           |              |             |           | chr8:7576260-7576282     | 0.721     | 3          | 0.914         |
| C-KCI156124 | 112      | CCAGGGTTCAGATTCCCGCT  |         |           |              |             |           | chr8:7583908-7583930     | 0.721     | 3          | 0.914         |
| C-KCI156124 | 112      | CCAGGGTTCAGATTCCCGCT  |         |           |              |             |           | chr8:7591556-7591578     | 0.721     | 3          | 0.914         |
| C-KCI156124 | 112      | CCAGGGTTCAGATTCCCGCT  |         |           |              |             |           | chr8:7599203-7599225     | 0.721     | 3          | 0.914         |
| C-KCI156124 | 112      | CCAGGGTTCAGATTCCCGCT  |         |           |              |             |           | chr8:7606851-7606873     | 0.721     | 3          | 0.914         |
| C-KCI156124 | 112      | CCAGGGTTCAGATTCCCGCT  |         |           |              |             |           | chr8:7614499-7614521     | 0.721     | 3          | 0.914         |
| C-KCI156124 | 112      | CCAGGGTTCAGATTCCCGCT  |         |           |              |             |           | chr8:7622147-7622169     | 0.721     | 3          | 0.914         |
| C-KCI156124 | 112      | CCAGGGTTCAGATTCCCGCT  |         |           |              |             |           | chr8:7629795-7629817     | 0.721     | 3          | 0.914         |
| C-KCI156124 | 112      | CCAGGGTTCAGATTCCCGCT  |         |           |              |             |           | chr8:7877203-7877225     | 0.721     | 3          | 0.914         |
| C-KCI156124 | 112      | CCAGGGTTCAGATTCCCGCT  |         |           |              |             |           | chr8:7884851-7884873     | 0.721     | 3          | 0.914         |
| D-JX236668  | 112      | CCAGGGATTAGATATCCACT  |         |           |              |             |           | chr4:55887307-55887329   | 0.788     | 4          | 0.788         |
| D-JX236668  | 95       | AAAATTACACACAGGGCCCA  | TRUE    |           | LINC00861    |             |           | chr8:126962194-126962216 | 0.700     | 3          | 0.514         |

(continued)

Supplementary Table S1. (Continued)

| Sample      | Position | gRNA template          | In exon | In intron | Gene             | In promoter | Promoters | UCSC coordinates          | CFD score | Mismatches | gRNA efficacy |
|-------------|----------|------------------------|---------|-----------|------------------|-------------|-----------|---------------------------|-----------|------------|---------------|
| D-JX236668  | 97       | AATTACACACAGGGCCAGG    |         |           |                  |             |           | chr9:34356238-34356260    | 0.807     | 4          | 0.538         |
| G-AB287004  | 110      | GGCCAGGGACTAGACTCCCA   |         | TRUE      | <i>LINC00861</i> |             |           | chr5:174135570-174135592  | 0.923     | 2          | 0.649         |
| A1-AB253422 | 95       | AGAATTATACACAGGGCCA    |         |           |                  |             |           | chr8:126962194-126962216  | 1.000     | 1          | 0.514         |
| A1-AB253422 | 95       | AGAATTATACACAGGGCCA    |         |           |                  |             |           | chr10:86657342-86657364   | 0.753     | 4          | 0.503         |
| A1-AB253422 | 97       | AATTATACACAGGGCCAGG    |         |           |                  |             |           | chr9:34356238-34356260    | 0.869     | 3          | 0.538         |
| A1-AB253422 | 97       | AATTATACACAGGGCCAGG    |         |           |                  |             |           | chrX:875035599-87503621   | 0.714     | 1          | 0.582         |
| A1-AB253422 | 99       | TTATACACAGGGCCAGGGA    |         | TRUE      | <i>SSU72</i>     |             |           | chr1:1494938-1494960      | 0.723     | 4          | 0.582         |
| G-AF196747  | 103      | ACACCAGGACAGGACTAG     |         | TRUE      | <i>TMEM209</i>   |             |           | chr7:129827361-129827383  | 0.779     | 2          | 0.684         |
| G-AF196747  | 110      | GACCAGGACTAGACTCCCA    |         |           |                  |             |           | chr5:174135570-174135592  | 0.738     | 3          | 0.649         |
| A1-AB287379 | 154      | CTAGTACCAGTTGATCCAGG   |         |           |                  |             |           | chr9:83857865-83857887    | 0.738     | 3          | 0.715         |
| B-HM469982  | 157      | GTACCAGTGGAGCCAGAGAA   |         |           |                  |             |           | chr3:30237368-30237390    | 0.707     | 3          | 0.552         |
| B-HM469982  | 160      | CCAGTGGAGCCAGAGAAAGT   |         |           |                  |             |           | chr3:149941221-149941243  | 0.788     | 4          | 0.573         |
| D-AB485651  | 157      | GTACCAGTTGAGCCACAGGT   |         | TRUE      | <i>C4orf22</i>   |             |           | chr4:81481621-81481643    | 0.754     | 3          | 0.785         |
| O-AY623602  | 158      | TACCAGTGTGAGAACTGAG    |         | TRUE      |                  |             |           | chr1:119242210-119242232  | 0.800     | 4          | 0.510         |
| B-EF363127  | 154      | CTAGTACCAGTTGAGACAGA   |         | TRUE      | <i>ATG2A</i>     |             |           | chr11:64684245-64684267   | 0.760     | 3          | 0.634         |
| B-EF363127  | 159      | ACCAGTGGAGCAGAGAAAGG   |         | TRUE      | <i>RALYL</i>     |             |           | chr8:85158379-85158401    | 0.791     | 4          | 0.628         |
| B-EF363127  | 160      | CCAGTGGAGCAGAGAAAGT    |         |           |                  |             |           | chr2:207485890-207485912  | 0.701     | 4          | 0.643         |
| G-AF196748  | 157      | GTACCAGTGGATCCAGCAGA   |         |           |                  |             |           | chr3:149941221-149941243  | 0.909     | 3          | 0.573         |
| G-KUI68302  | 157      | GTACCAGTGGATCCAGCAGA   |         |           |                  |             |           | chr3:14715437-14715459    | 0.813     | 1          | 0.604         |
| O-KUI68298  | 154      | CTAGTACCAGTTGAGAAAGA   |         |           |                  |             |           | chr3:14715437-14715459    | 0.813     | 1          | 0.604         |
| O-KUI68298  | 154      | CTAGTACCAGTTGAGAAAGA   |         |           |                  |             |           | chr15:37680272-37680294   | 0.852     | 3          | 0.602         |
| O-KUI68298  | 158      | TACCAGTGTGAGAAAGAGG    |         | TRUE      | <i>RAPIA</i>     |             |           | chr1:112094876-112094898  | 0.737     | 3          | 0.539         |
| O-KUI68298  | 159      | ACCAGTGTGAGAAAGAGG     |         |           |                  |             |           | chr22:34570763-34570785   | 0.738     | 4          | 0.634         |
| O-KUI68298  | 159      | ACCAGTGTGAGAAAGAGG     |         | TRUE      | <i>DSP</i>       |             |           | chr6:7563874-7563896      | 0.824     | 4          | 0.559         |
| B-GQ386793  | 157      | GTACCAGTGGAGCCAGAGAA   |         |           |                  |             |           | chr8:37876383-37876405    | 0.735     | 4          | 0.551         |
| B-GQ386793  | 160      | CCAGTGGAGCCAGAGAAAGT   |         |           |                  |             |           | chr3:30237368-30237390    | 0.707     | 3          | 0.552         |
| G-AB287004  | 156      | AGTACCAATAGATCCAGCAG   |         | TRUE      | <i>DLGAP2</i>    |             |           | chr3:149941221-149941243  | 0.788     | 4          | 0.573         |
| F1-AB485657 | 158      | TACCAGTTGAGCCAGAGGAG   | TRUE    |           | <i>WDR78</i>     |             |           | chr8:1616110-1616132      | 0.781     | 3          | 0.559         |
| G-AF196747  | 156      | AGTACCAATGAAACCAGAAAG  |         |           |                  |             |           | chr1:67299340-67299362    | 0.714     | 2          | 0.628         |
| O-KUI68282  | 155      | TAGTGCCAGTTGCAAGGAG    |         |           |                  |             |           | chr2:240647785-240647807  | 0.829     | 2          | 0.537         |
| O-KUI68282  | 159      | GCCAGTGTCAAAGGAGGAGG   |         | TRUE      | <i>TOM1L2</i>    |             |           | chr6:142124604-142124626  | 0.813     | 4          | 0.506         |
| B-HM469982  | 165      | GGAGCCAGAGAGGTAGAAAG   |         |           |                  |             |           | chr17:17791260-17791282   | 0.743     | 3          | 0.545         |
| B-HM469982  | 165      | GGAGCCAGAGAGGTAGAAAG   |         |           |                  |             |           | chr6:156402597-156402619  | 1.000     | 2          | 0.505         |
| B-HM469982  | 167      | AGCCAGAGAAAGTAAAGAG    |         | TRUE      | <i>RALYL</i>     |             |           | chr8:41173055-41173077    | 0.929     | 1          | 0.521         |
| C-AF196733  | 166      | GACCCAAAGTAAAGTAAAGA   |         | TRUE      | <i>DMMBP-ASI</i> |             |           | chr8:85232552-85232574    | 0.836     | 2          | 0.540         |
| O-AY623602  | 166      | TCAGAAGCTGAGCCAGAAAG   |         | TRUE      |                  |             |           | chr10:101698828-101698850 | 0.813     | 2          | 0.680         |
| O-AY623602  | 166      | TCAGAAGCTGAGCCAGAAAG   |         | TRUE      | <i>KCNK2</i>     |             |           | chr1:215286770-215286792  | 0.923     | 3          | 0.545         |
| O-AY623602  | 166      | TCAGAAGCTGAGCCAGAAAG   |         | TRUE      | <i>RHD</i>       |             |           | chr1:25604058-25604080    | 0.900     | 2          | 0.658         |
| O-AY623602  | 166      | TCAGAAGCTGAGCCAGAAAG   |         | TRUE      | <i>RHCE</i>      |             |           | chr1:25742248-25742270    | 0.807     | 4          | 0.843         |
| O-AY623602  | 166      | TCAGAAGCTGAGCCAGAAAG   |         |           |                  |             |           | chr19:15668376-15668398   | 0.807     | 4          | 0.921         |
| O-AY623602  | 166      | TCAGAAGCTGAGCCAGAAAG   |         |           |                  |             |           | chr19:48885749-48885771   | 0.746     | 4          | 0.636         |
| O-AY623602  | 167      | CAGAAAGTGGCCAGAAAGA    |         | TRUE      | <i>ACACA</i>     |             |           | chr3:112871308-112871330  | 0.941     | 3          | 0.607         |
| A1-AB253429 | 165      | GATGAAGTAAAGTAAAGAGG   |         |           |                  |             |           | chr17:35717329-35717351   | 0.800     | 1          | 0.619         |
| A1-AB253429 | 166      | GGATGAAGTAAAGTAAAGAGG  |         |           |                  |             |           | chr12:63344314-63344336   | 0.714     | 1          | 0.546         |
| A1-AB253429 | 167      | ATGAAGTAAAGTAAAGAGG    |         |           |                  |             |           | chr3:27132976-27132998    | 0.929     | 3          | 0.510         |
| B-EF363127  | 165      | GGAGACAGAGAAAGGTAGAAAG |         |           |                  |             |           | chr2:108033011-108033033  | 0.738     | 3          | 0.514         |
| B-EF363127  | 165      | GGAGACAGAGAAAGGTAGAAAG |         |           |                  |             |           | chr15:35001637-35001659   | 0.831     | 2          | 0.654         |

(continued)

Supplementary Table S1. (Continued)

| Sample      | Position | gRNA template         | In exon | In intron | Gene             | In promoter | Promoters                 | UCSC coordinates          | CFD score | Mismatches | gRNA efficacy |
|-------------|----------|-----------------------|---------|-----------|------------------|-------------|---------------------------|---------------------------|-----------|------------|---------------|
| B-EF363127  | 165      | GGAGACAGAGAAGGTAGAAG  |         |           |                  |             |                           | chr13:114205281-114205303 | 0.813     | 4          | 0.543         |
| B-EF363127  | 167      | AGACAGAGAAAGGTAGAAG   | TRUE    |           | <i>DNMBP-ASI</i> |             | chr10:101698828-101698850 | 0.938                     | 1         | 0.680      |               |
| B-EF363127  | 167      | AGACAGAGAAAGGTAGAAG   | TRUE    |           | <i>FBXLI7</i>    |             | chr5:107410347-107410369  | 0.789                     | 2         | 0.503      |               |
| B-EF363127  | 167      | AGACAGAGAAAGGTAGAAG   | TRUE    |           | <i>CEMIP</i>     |             | chr15:81224835-81224857   | 0.789                     | 1         | 0.676      |               |
| B-EF363127  | 167      | AGACAGAGAAAGGTAGAAG   | TRUE    |           | <i>MNVAT3</i>    |             | chr3:139354366-139354388  | 0.789                     | 3         | 0.527      |               |
| C-AB485645  | 167      | ACCAAGGAAAGTAGAAGAG   | TRUE    |           | <i>LRRC61</i>    |             | chr7:150021447-150021469  | 0.867                     | 3         | 0.598      |               |
| O-AB485669  | 166      | ACAGAAGATGAGGCAAAAAG  | TRUE    |           | <i>QKI</i>       |             | chr6:163969438-163969460  | 0.818                     | 4         | 0.586      |               |
| O-AB485669  | 166      | ACAGAAGATGAGGCAAAAAG  | TRUE    |           |                  |             | chr11:55821275-55821297   | 0.733                     | 2         | 0.880      |               |
| O-AB485669  | 166      | ACAGAAGATGAGGCAAAAAG  | TRUE    |           |                  |             | chr16:13521570-13521592   | 0.720                     | 3         | 0.690      |               |
| C-JN188292  | 167      | ACCCAGGAAAGTAGAAGAG   | TRUE    |           | <i>LRRC61</i>    |             | chr7:150021447-150021469  | 0.867                     | 3         | 0.598      |               |
| G-KUI68302  | 166      | GATCCAGCAGAGGTAGAAGG  | TRUE    |           | <i>EXOC6B</i>    |             | chr2:73022009-73022031    | 0.765                     | 3         | 0.826      |               |
| O-KUI68298  | 166      | TCAGAAGAAGAGGCAGAAAAG | TRUE    |           |                  |             | chr12:67538797-67538819   | 0.824                     | 3         | 0.606      |               |
| O-KUI68298  | 166      | TCAGAAGAAGAGGCAGAAAAG | TRUE    |           |                  |             | chr8:133475166-133475188  | 0.803                     | 4         | 0.592      |               |
| O-KUI68298  | 166      | TCAGAAGAAGAGGCAGAAAAG | TRUE    |           | <i>KCNQ3</i>     |             | chr6:32125374-32125396    | 0.795                     | 4         | 0.575      |               |
| B-GQ386793  | 165      | GGAGCCAGAGAAGGTAGAAG  | TRUE    |           |                  |             | chr8:41173055-41173077    | 0.929                     | 1         | 0.521      |               |
| B-GQ386793  | 165      | GGAGCCAGAGAAGGTAGAAG  | TRUE    |           | <i>RALYL</i>     |             | chr8:85232552-85232574    | 0.836                     | 2         | 0.540      |               |
| B-GQ386793  | 167      | AGCCAGAGAAGGTAGAAGAG  | TRUE    |           | <i>DNMBP-ASI</i> |             | chr10:101698828-101698850 | 0.813                     | 2         | 0.680      |               |
| G-AB287004  | 166      | GATCCAGCAGAGGTAGAAGG  | TRUE    |           | <i>EXOC6B</i>    |             | chr2:73022009-73022031    | 0.765                     | 3         | 0.826      |               |
| O-KUI68297  | 166      | ACAAAAGAGAGGCAGAAAAG  | TRUE    |           |                  |             | chr1:221242892-221242914  | 0.933                     | 3         | 0.534      |               |
| O-KUI68297  | 166      | ACAAAAGAGAGGCAGAAAAG  | TRUE    |           | <i>TNSI</i>      |             | chr2:218750973-218750995  | 0.848                     | 3         | 0.813      |               |
| A1-AB253422 | 167      | ATCCAGAGAAAGTAGAAGAG  | TRUE    |           |                  |             | chr12:59865524-59865546   | 0.878                     | 4         | 0.680      |               |
| G-AF196747  | 165      | GAACCAGAAAGGTAGAAGG   | TRUE    |           | <i>CCDC94</i>    |             | chr1:108090386-108090408  | 0.786                     | 3         | 0.606      |               |
| D-AB485651  | 178      | GTAGAGGAGGACACTGAAGG  | TRUE    |           | <i>UST</i>       |             | chr19:4253243-4253265     | 0.900                     | 4         | 0.515      |               |
| D-JX236679  | 178      | GTAGAGGAGGACACTGAAGG  | TRUE    |           | <i>UST</i>       |             | chr6:149245619-149245641  | 0.788                     | 3         | 0.715      |               |
| D-JX236668  | 178      | GTAGAGGAGGACACTGAAGG  | TRUE    |           | <i>UST</i>       |             | chr6:149245619-149245641  | 0.788                     | 2         | 0.715      |               |
| A1-AB287379 | 221      | CTATATGCCAACATGGAATG  |         |           |                  |             | chrX:94294537-94294559    | 0.856                     | 4         | 0.551      |               |
| B-HM469982  | 224      | TGAGCTGCATGGATGGAG    |         |           |                  |             | chr11:126028693-126028715 | 0.774                     | 4         | 0.567      |               |
| D-AB485651  | 221      | CTATATGCCAGCATGGAATG  |         |           |                  |             | chr2:148008598-148008620  | 0.706                     | 4         | 0.530      |               |
| D-AB485651  | 225      | ATGCCAGCATGGAATGGAGG  |         |           |                  |             | chr5:160341758-160341780  | 0.700                     | 4         | 0.705      |               |
| A1-AB253429 | 221      | CTATATGCCAACATGGAATG  |         |           |                  |             | chrX:94294537-94294559    | 0.856                     | 4         | 0.551      |               |
| O-AB485669  | 225      | TTGTAACCATGGCTTTGAAG  |         |           |                  |             | chr5:139139708-139139730  | 0.700                     | 2         | 0.625      |               |
| A1-AB485632 | 221      | CTATATGCCAACATGGAATG  |         |           |                  |             | chr8:140387431-140387453  | 0.735                     | 3         | 0.679      |               |
| C-JN188292  | 219      | CCCTATGAGCCAGCATGGAG  | TRUE    |           | <i>SLC35F3</i>   |             | chrX:94294537-94294559    | 0.856                     | 4         | 0.551      |               |
| G-KUI68302  | 225      | CTGCCAGCATGGAATGGAGG  |         |           |                  |             | chr1:234208498-234208520  | 0.729                     | 4         | 0.529      |               |
| O-KUI68298  | 220      | CCAGTTGTGATCATGGCCA   | TRUE    |           | <i>ANKS1A</i>    |             | chr5:160341758-160341780  | 0.700                     | 4         | 0.705      |               |
| A1-AF196742 | 221      | CTATATGCCAACATGGAATG  | TRUE    |           |                  |             | chr6:35041095-35041117    | 0.909                     | 2         | 0.641      |               |
| B-GQ386793  | 224      | TGAGCTGCATGGATGGAG    | TRUE    |           | <i>COL9A2</i>    |             | chrX:94294537-94294559    | 0.856                     | 4         | 0.551      |               |
| F1-AF196763 | 214      | CTACACCCCATGAGCCAGCA  | TRUE    |           |                  |             | chr1:40779291-40779313    | 0.750                     | 3         | 0.726      |               |
| A1-AB253422 | 221      | CTATATGCCAGCATGGAATG  | TRUE    |           |                  |             | chr2:148008598-148008620  | 0.706                     | 4         | 0.530      |               |
| D-M22639    | 221      | ATGCCAGCATGGAATGGAGG  | TRUE    |           | <i>MRPS9</i>     |             | chr5:160341758-160341780  | 0.827                     | 4         | 0.705      |               |
| D-M22639    | 225      | CTGCCAGCATGGAATGGAGG  | TRUE    |           |                  |             | chr2:105694014-105694036  | 0.700                     | 4         | 0.535      |               |
| G-AF196747  | 225      | CTGCCAGCATGGAATGGAGG  | TRUE    |           |                  |             | chr5:160341758-160341780  | 0.700                     | 4         | 0.705      |               |
| O-KUI68282  | 224      | CTTGTAAATCATGGCCCTGAG |         |           |                  |             | chr20:39476871-39476893   | 0.807                     | 3         | 0.678      |               |
| G-KUI68277  | 255      | AGAAGTCTGGTATGGAGAT   |         |           |                  |             | chr2:84300393-84300415    | 0.753                     | 3         | 0.525      |               |
| C-AB485645  | 253      | AGAGAAGTATTAAGTTGAA   |         |           |                  |             | chr1:212812049-212812071  | 0.878                     | 3         | 0.539      |               |
| O-AB485669  | 259      | ATACTGAAATGCCAGTTTGA  |         |           |                  |             | chr9:84782026-84782048    | 0.807                     | 4         | 0.632      |               |

(continued)

Supplementary Table S1. (Continued)

| Sample      | Position | gRNA template         | In exon | In intron | Gene    | In promoter | Promoters                 | UCSC coordinates          | CFD score | Mismatches | gRNA efficacy |
|-------------|----------|-----------------------|---------|-----------|---------|-------------|---------------------------|---------------------------|-----------|------------|---------------|
| A1-AB485632 | 253      | AGAGAAACAGTAAATGTGGAA |         | TRUE      | SORCS3  |             |                           | chr10:106500528-106500550 | 0.762     | 4          | 0.706         |
| O-KUI168298 | 255      | GGAAATGCTAAAGTGGCAGT  |         | TRUE      | SORCS3  |             | chr2:78287187-78287209    | 0.765                     | 4         | 4          | 0.615         |
| A1-AF196742 | 253      | AGAGAAACAITTAATGTGGAA |         | TRUE      | SORCS3  |             | chr10:106500528-106500550 | 0.700                     | 4         | 4          | 0.706         |
| G-AB287004  | 259      | GTGCTGGTATGGAAGTTTGA  |         |           |         |             | chr9:87916887-87916909    | 0.713                     | 3         | 3          | 0.511         |
| O-KUI168297 | 259      | ATACTGAAATGGCAGTTTGA  |         |           |         |             | chr9:84782026-84782048    | 0.807                     | 4         | 4          | 0.632         |
| F1-AB485657 | 253      | GGAGAAGTACTGATGTGGAA  |         | TRUE      | SORCS3  |             | chr9:137933132-137933154  | 0.941                     | 3         | 3          | 0.695         |
| F1-AB485657 | 253      | GGAGAAGTACTGATGTGGAA  |         | TRUE      | SORCS3  |             | chr10:106500528-106500550 | 0.755                     | 4         | 4          | 0.706         |
| G-AF196747  | 255      | AGAAAGTCTGGTATGGAGAT  |         |           |         |             | chr2:84300393-84300415    | 0.753                     | 3         | 3          | 0.525         |
| O-KUI168282 | 259      | ATACTGAAATGGCAGTTTGA  |         |           |         |             | chr9:84782026-84782048    | 0.807                     | 3         | 3          | 0.632         |
| B-HM469982  | 312      | GCTGCATCCGGAGTACTACA  |         | TRUE      | DIP2C   |             | chr5:162139400-162139422  | 0.755                     | 4         | 4          | 0.513         |
| A1-AB253429 | 315      | ACATCCGGAGTTTTACAAAG  |         |           |         |             | chr10:645683-645705       | 0.829                     | 4         | 4          | 0.618         |
| B-EF363127  | 312      | GCTGCATCCGGAGTACTACA  |         |           |         |             | chr5:162139400-162139422  | 0.755                     | 4         | 4          | 0.513         |
| C-AB485645  | 312      | GCTGCATCCGGAGTACTACA  |         |           |         |             | chr5:162139400-162139422  | 0.839                     | 3         | 3          | 0.513         |
| D-JX236679  | 315      | GCTATCCGGAGTACTCAAAG  |         | TRUE      | ADAMTS3 |             | chr4:73390611-73390633    | 0.727                     | 2         | 2          | 0.535         |
| G-AF196748  | 312      | GCTGCATCCGGAGTACTACA  |         |           |         |             | chr5:162139400-162139422  | 0.755                     | 4         | 4          | 0.513         |
| O-AB485669  | 315      | CCACCCAGAGTCTCCCCA    |         |           |         |             | chr12:105633288-105633310 | 0.947                     | 3         | 3          | 0.598         |
| O-AB485669  | 318      | CCCAGAGTCTCCCCAAG     |         | TRUE      | NRXN3   |             | chr14:79838771-79838793   | 0.745                     | 4         | 4          | 0.573         |
| A1-AB485632 | 315      | GCTATCCGGAGTACTCAAAG  |         | TRUE      | ADAMTS3 |             | chr4:73390611-73390633    | 0.727                     | 2         | 2          | 0.535         |
| D-KUI168272 | 315      | GCATCCGGAGTACTCAAAG   |         | TRUE      | ADAMTS3 |             | chr4:73390611-73390633    | 0.727                     | 2         | 2          | 0.535         |
| B-GQ386793  | 312      | GCTGCATCCGGAGTACTACA  |         |           |         |             | chr5:162139400-162139422  | 0.755                     | 4         | 4          | 0.513         |
| F1-AF196763 | 315      | ACATCCGGAGTACTCAAAG   |         | TRUE      | SLC05A1 |             | chr8:70730202-70730224    | 0.791                     | 4         | 4          | 0.592         |
| G-AB287004  | 312      | GCTGCATCCGGAGTACTACA  |         |           |         |             | chr5:162139400-162139422  | 0.755                     | 4         | 4          | 0.513         |
| O-KUI168297 | 313      | ATCCACCCAGAGCTCTTCCA  |         |           |         |             | chr7:36149956-36149978    | 0.784                     | 3         | 3          | 0.706         |
| B-AB731663  | 312      | GCTGTTCCGGAGTACTACA   |         | TRUE      |         | ZNF83_1     | chr19:52690031-52690053   | 0.739                     | 4         | 4          | 0.798         |
| F1-AB485657 | 315      | ACATCCGGAGTACTCAAAG   |         | TRUE      | SLC05A1 |             | chr8:70730202-70730224    | 0.791                     | 4         | 4          | 0.592         |
| G-AF196747  | 312      | GCTGCATCCGGAGTACTACA  |         |           |         |             | chr5:162139400-162139422  | 0.755                     | 4         | 4          | 0.513         |
| A1-AB287379 | 384      | GGGAGGTGTGTTTGGGCG    |         |           |         |             | chr9:132232322-132232344  | 0.714                     | 4         | 4          | 0.539         |
| A1-AB287379 | 395      | GTTTGGCGGAGTTGGGGAG   |         |           |         |             | chr10:103333887-103333909 | 0.750                     | 3         | 3          | 0.529         |
| B-HM469982  | 375      | GGACTTCCAGGAGGCGGTG   |         |           |         |             | chr3:193667547-193667569  | 0.769                     | 3         | 3          | 0.715         |
| B-HM469982  | 385      | GCGAGCTGGCCCTGGGCGG   |         |           |         |             | chr1:229896409-229896431  | 0.714                     | 4         | 4          | 0.521         |
| B-HM469982  | 400      | GCGGGACTGGGAGTGGCG    |         | TRUE      | DLCI    |             | chr8:12991014-12991036    | 0.844                     | 3         | 3          | 0.560         |
| B-HM469982  | 400      | GCGGGACTGGGAGTGGCG    |         | TRUE      | FXSD1   |             | chr19:35632217-35632239   | 0.731                     | 4         | 4          | 0.517         |
| D-AB485651  | 380      | TCCAGGGAGGCGTGACATG   |         |           |         |             | chr5:162920275-162920297  | 0.923                     | 4         | 4          | 0.615         |
| D-AB485651  | 395      | GACATGGCGGGACTGGGAG   |         | TRUE      | GRM1    |             | chr5:146658371-146658393  | 0.857                     | 3         | 3          | 0.566         |
| G-KUI168277 | 375      | GGACTTCCGGGAGGCGGTG   | TRUE    |           | GLIPR2  |             | chr9:36144888-36144910    | 0.737                     | 4         | 4          | 0.520         |
| G-KUI168277 | 375      | GGACTTCCGGGAGGCGGTG   |         |           |         |             | chr3:193667547-193667569  | 0.717                     | 4         | 4          | 0.715         |
| G-KUI168277 | 380      | TTCCGGGAGGCGTGGACTG   |         |           |         |             | chr12:89346843-89346865   | 0.738                     | 4         | 4          | 0.557         |
| G-KUI168277 | 390      | GCGTGGACTGGAGGCGCTG   |         |           |         |             | chr7:119251043-119251065  | 0.813                     | 4         | 4          | 0.563         |
| O-AY623602  | 385      | TGTGGAGGGATAGGGGCGG   |         |           |         |             | chr9:98458750-98458772    | 0.754                     | 4         | 4          | 0.503         |
| A1-AB253429 | 384      | GGGAGGTGTGTTTGGGCG    |         |           |         |             | chr9:132232322-132232344  | 0.714                     | 4         | 4          | 0.539         |
| A1-AB253429 | 395      | GTTTGGCGGAGTTGGGGAG   |         |           |         |             | chr10:103333887-103333909 | 0.750                     | 3         | 3          | 0.529         |
| B-EF363127  | 395      | GGGAGGTGTGTTTGGGCG    |         | TRUE      | CTNND2  |             | chr10:103333887-103333909 | 0.750                     | 3         | 3          | 0.529         |
| B-EF363127  | 400      | GGGAGGTGTGTTTGGGCG    |         | TRUE      | DLCI    |             | chr5:11765460-11765482    | 0.714                     | 2         | 2          | 0.634         |
| B-EF363127  | 400      | GGCGGACAGGGAGTGGCG    |         | TRUE      | DLCI    |             | chr8:12991014-12991036    | 0.909                     | 2         | 2          | 0.560         |
| C-AB485645  | 394      | GGTCTGGCGGACTGGGAG    |         | TRUE      | CAB39L  |             | chr13:49960885-49960907   | 0.747                     | 4         | 4          | 0.517         |
| G-AF196748  | 375      | GGACTTCCAGGAGGCGCGG   |         | TRUE      | LRP4    |             | chr11:46921188-46921210   | 0.764                     | 4         | 4          | 0.641         |
| G-AF196748  | 375      | GGACTTCCAGGAGGCGCGG   |         | TRUE      | PLA2R1  |             | chr2:160917025-160917047  | 0.747                     | 4         | 4          | 0.801         |
| G-AF196748  | 394      | GGCTGGGAGGCGTGGGGA    |         | TRUE      | GRK5    |             | chr10:120971281-120971303 | 0.733                     | 4         | 4          | 0.648         |
| O-AB485669  | 383      | ACGCTGGGAGGACAAAGGGG  |         | TRUE      |         | SLC2A11_3   | chr22:23876264-23876286   | 0.813                     | 4         | 4          | 0.614         |

(continued)

Supplementary Table S1. (Continued)

| Sample      | Position | gRNA template        | In exon | In intron | Gene           | In promoter | Promoters                        | UCSC coordinates         | CFD score | Mismatches | gRNA efficacy |
|-------------|----------|----------------------|---------|-----------|----------------|-------------|----------------------------------|--------------------------|-----------|------------|---------------|
| A1-AB485632 | 384      | GGGAGGGTGTGGTTTGGGGC |         |           |                |             |                                  | chr9:132232322-132232344 | 0.714     | 4          | 0.539         |
| A1-AB485632 | 395      | GTTTGGGCGGAGTTGGGGAG |         |           |                |             | chr10:103333887-103333909        | 0.750                    | 3         | 3          | 0.529         |
| C-JN188292  | 395      | GTCTGGGCGGACTGGGGAG  | TRUE    |           | <i>DOK2</i>    |             | chr8:21638068-21638090           | 0.875                    | 4         | 4          | 0.573         |
| C-JN188292  | 395      | GTCTGGGCGGACTGGGGAG  |         |           |                |             | chr8_gl000197_random:36671-36693 | 0.875                    | 4         | 4          | 0.573         |
| D-KUI68272  | 374      | GGACTTTCGGGAGGCGGTG  | TRUE    |           | <i>GLIPR2</i>  |             | chr9:36144888-36144910           | 0.737                    | 4         | 4          | 0.520         |
| D-KUI68272  | 374      | GGACTTTCGGGAGGCGGTG  |         |           |                |             | chr3:193667547-193667569         | 0.717                    | 4         | 4          | 0.715         |
| D-KUI68302  | 394      | GGAGCTTCAGGGAGGCGGG  |         |           |                |             | chr1:229896409-229896431         | 0.714                    | 3         | 3          | 0.521         |
| G-KUI68302  | 394      | GGCTGGGAGGGTTGGGGA   |         |           | <i>GRK5</i>    |             | chr10:120971281-120971303        | 1.000                    | 3         | 3          | 0.648         |
| A1-AF196742 | 373      | GGACTTTCAGGGAGGCGGTG |         |           |                |             | chr8:49363277-49363299           | 0.737                    | 3         | 3          | 0.571         |
| A1-AF196742 | 376      | ACTTTCAGGGAGGAGTGG   |         |           |                |             | chr2:238822868-238822890         | 0.765                    | 3         | 3          | 0.607         |
| A1-AF196742 | 389      | GGAGTGGTTGGCGGAGTGG  |         |           | <i>IFT122</i>  |             | chr3:129229408-129229430         | 0.941                    | 3         | 3          | 0.505         |
| A1-AF196742 | 397      | TTGGCGGAGTGGGAGTGG   |         |           | <i>SDK2</i>    |             | chr17:71555711-71555733          | 0.723                    | 3         | 3          | 0.507         |
| B-GQ386793  | 375      | GGACTTTCAGGGAGGCGGTG |         |           |                |             | chr3:193667547-193667569         | 0.769                    | 3         | 3          | 0.715         |
| B-GQ386793  | 385      | GGAGGCGTGGCTGGGGCGG  |         |           |                |             | chr1:229896409-229896431         | 0.714                    | 3         | 3          | 0.521         |
| B-GQ386793  | 400      | GCGGACTGGGAGTGGCGG   |         |           | <i>DLCI</i>    |             | chr8:12991014-12991036           | 0.844                    | 3         | 3          | 0.560         |
| B-GQ386793  | 400      | GCGGACTGGGAGTGGCGG   |         |           | <i>FXYP1</i>   |             | chr19:35632217-35632239          | 0.731                    | 4         | 4          | 0.517         |
| C-KC156124  | 394      | GGTCTGGCGGACTGGGAG   |         |           | <i>CAB39L</i>  |             | chr13:49960885-49960907          | 0.747                    | 4         | 4          | 0.517         |
| C-KC156124  | 400      | GGCGGACTGGGAGTGGCCA  |         |           | <i>ATP2B4</i>  |             | chr1:203645478-203645500         | 0.708                    | 4         | 4          | 0.625         |
| D-JX236668  | 373      | GGGACTTTCAGGGAGGAGT  | TRUE    |           | <i>CCDC136</i> | HILPDA_1    | chr7:128455924-128455946         | 0.867                    | 2         | 2          | 0.505         |
| D-JX236668  | 379      | TTCCAGGAGGAGTAACAGG  |         |           | <i>CBR4</i>    |             | chr4:169900257-169900279         | 0.820                    | 3         | 3          | 0.617         |
| D-JX236668  | 395      | ACAGGGCGGGACTGGGAG   |         |           | <i>KIF19</i>   |             | chr17:72336104-72336126          | 0.817                    | 4         | 4          | 0.566         |
| D-JX236668  | 395      | ACAGGGCGGGACTGGGAG   |         |           |                |             | chr3:6172058-6172080             | 0.817                    | 4         | 4          | 0.646         |
| F1-AF196763 | 394      | CCAGAGGGCGGACAAAGGA  |         |           | <i>EXOC7</i>   |             | chr4:174649420-174649442         | 0.871                    | 4         | 4          | 0.818         |
| F1-AF196763 | 394      | CCAGAGGGCGGACAAAGGA  |         |           | <i>PEBP4</i>   |             | chr17:74083006-74083028          | 0.800                    | 4         | 4          | 0.869         |
| F1-AF196763 | 395      | CAGAGGGCGGACAAAGGAG  |         |           |                | KIAA1967_2  | chr8:22604104-22604126           | 0.913                    | 3         | 3          | 0.533         |
| G-AB287004  | 394      | GGCTGGGAGGGCTGGGGGA  |         |           | <i>GRK5</i>    | KIAA1967_1  | chr10:120971281-120971303        | 0.733                    | 4         | 4          | 0.648         |
| O-KUI68297  | 383      | AGCTGGGAGGGACAAAGGGG |         |           |                | SLC2A11_3   | chr22:23876264-23876286          | 0.813                    | 4         | 4          | 0.614         |
| A1-AB253422 | 384      | GGGAGGGTGTGGTTGGGGC  |         |           |                |             | chr9:132232322-132232344         | 0.714                    | 4         | 4          | 0.539         |
| A1-AB253422 | 395      | GTTTGGGCGGAGTTGGGGAG |         |           |                |             | chr10:103333887-103333909        | 0.750                    | 3         | 3          | 0.529         |
| B-AB731663  | 375      | GGACTTTCAGGGAGGCGGTG |         |           |                |             | chr3:193667547-193667569         | 0.769                    | 3         | 3          | 0.715         |
| B-AB731663  | 385      | GGAGGCGTGGCTGGGGCGG  |         |           |                |             | chr1:229896409-229896431         | 0.714                    | 3         | 3          | 0.521         |
| B-AB731663  | 400      | GCGGACTGGGAGTGGCGG   |         |           | <i>DLCI</i>    |             | chr8:12991014-12991036           | 0.844                    | 3         | 3          | 0.560         |
| B-AB731663  | 400      | GCGGACTGGGAGTGGCGG   |         |           | <i>FXYP1</i>   |             | chr19:35632217-35632239          | 0.731                    | 4         | 4          | 0.517         |
| D-M22639    | 374      | GGACTTTCGGGAGGCGGTG  | TRUE    |           | <i>GLIPR2</i>  |             | chr9:36144888-36144910           | 0.737                    | 4         | 4          | 0.520         |
| D-M22639    | 374      | GGACTTTCGGGAGGCGGTG  |         |           |                |             | chr3:193667547-193667569         | 0.717                    | 4         | 4          | 0.715         |
| D-M22639    | 379      | TTCCGGGAGGCGTGGACTG  |         |           |                |             | chr12:89346843-89346865          | 0.738                    | 4         | 4          | 0.557         |
| F1-AB485657 | 382      | CCAGAGGGCGGACAGAGGG  | TRUE    |           | <i>LOXL4</i>   |             | chr10:100022646-100022668        | 0.875                    | 4         | 4          | 0.552         |
| F1-AB485657 | 382      | CCAGAGGGCGGACAGAGGG  |         |           |                | FBXO2_1     | chr1:11653942-11653964           | 0.734                    | 4         | 4          | 0.816         |
|             |          |                      |         |           |                | FBXO6_3     |                                  |                          |           |            |               |
|             |          |                      |         |           |                | FBXO2_2     |                                  |                          |           |            |               |
|             |          |                      |         |           |                | FBXO4_1     |                                  |                          |           |            |               |
|             |          |                      |         |           |                | FBXO6_2     |                                  |                          |           |            |               |
|             |          |                      |         |           |                | FBXO4_2     |                                  |                          |           |            |               |
| F1-AB485657 | 382      | CCAGAGGGCGGACAGAGGG  |         |           |                |             | chr10:133184476-133184498        | 0.730                    | 4         | 4          | 0.701         |
| F1-AB485657 | 394      | CCAGAGGGCGGACTGGGGGA |         |           |                |             | chrX:1226723-1226745             | 0.726                    | 3         | 3          | 0.560         |
| F1-AB485657 | 394      | CCAGAGGGCGGACTGGGGGA |         |           |                |             | chrY:1176723-1176745             | 0.726                    | 3         | 3          | 0.560         |
| G-AF196747  | 394      | GGCTGGGAGGGCTGGGGGA  | TRUE    |           | <i>GRK5</i>    |             | chr10:120971281-120971303        | 0.733                    | 4         | 4          | 0.648         |

(continued)

Supplementary Table S1. (Continued)

| Sample      | Position | gRNA template          | In exon | In intron | Gene | In promoter | Promoters | UCSC coordinates          | CFD score | Mismatches | gRNA efficacy |
|-------------|----------|------------------------|---------|-----------|------|-------------|-----------|---------------------------|-----------|------------|---------------|
| O-KU168282  | 383      | AGTGTGGGAGGGATAAGGGG   |         |           |      |             |           | chr9:36169095-36169117    | 1.000     | 3          | 0.626         |
| D-AB485651  | 417      | GCTAACCCCTCAGATGCTGCA  |         |           |      |             |           | chr7:114526254-114526276  | 0.779     | 4          | 0.691         |
| G-KU168277  | 418      | CTAACCCCTCAGAAGCTGCAT  |         |           |      |             |           | chr17:35124135-35124157   | 0.724     | 3          | 0.576         |
| O-AY623602  | 417      | GCTAACCCCTCAGATGCTGCA  |         |           |      |             |           | chr7:114526254-114526276  | 0.779     | 4          | 0.691         |
| A1-AB253429 | 417      | GCTAACCCCTCAGATGCTGCA  |         |           |      |             |           | chr7:114526254-114526276  | 0.779     | 4          | 0.691         |
| D-JX236679  | 417      | GCTAACCCCTCAGATGCTGCA  |         |           |      |             |           | chr7:114526254-114526276  | 0.779     | 4          | 0.691         |
| G-AF196748  | 418      | CTAACCCCTCAGAAGCTGCAT  |         |           |      |             |           | chr17:35124135-35124157   | 0.724     | 3          | 0.576         |
| O-AB485669  | 418      | CTAACCCCTCAGAAGCTGCAT  |         |           |      |             |           | chr17:35124135-35124157   | 0.724     | 3          | 0.576         |
| A1-AB485632 | 417      | GTTAACCCCTCAGATGCTGCA  |         |           |      |             |           | chr7:114526254-114526276  | 0.779     | 4          | 0.691         |
| D-KU168272  | 417      | GTTAACCCCTCAGATGCTGCA  |         |           |      |             |           | chr7:114526254-114526276  | 0.857     | 3          | 0.691         |
| D-KU168272  | 417      | GTTAACCCCTCAGATGCTGCA  |         |           |      |             |           | chr7:114526254-114526276  | 0.827     | 4          | 0.843         |
| D-KU168272  | 417      | GTTAACCCCTCAGATGCTGCA  |         |           |      |             |           | chr4:172066842-172066864  | 0.704     | 3          | 0.835         |
| G-KU168302  | 418      | CTAACCCCTCAGAAGCTGCAT  |         |           | ULK4 |             |           | chr3:41359425-41359447    | 0.704     | 3          | 0.835         |
| O-KU168298  | 418      | CTAACCCCTCAGAAGCTGCAT  |         |           |      |             |           | chr17:35124135-35124157   | 0.724     | 3          | 0.576         |
| A1-AF196742 | 417      | GCTAACCCCTCAGATGCTGCA  |         |           |      |             |           | chr17:35124135-35124157   | 0.779     | 4          | 0.691         |
| C-KC156124  | 417      | GCCAAAGCCCTCAGATGCTGCA |         |           |      |             |           | chr7:54454451-54454473    | 0.700     | 3          | 0.695         |
| D-JX236668  | 417      | GCTAACCCCTCAGATGCTGCA  |         |           |      |             |           | chr7:114526254-114526276  | 0.779     | 4          | 0.691         |
| F1-AF196763 | 417      | GCTAACCCCTCAGATGCTGCA  |         |           |      |             |           | chr7:114526254-114526276  | 0.779     | 4          | 0.691         |
| G-AB287004  | 418      | CTAACCCCTCAGAAGCTGCAT  |         |           |      |             |           | chr17:35124135-35124157   | 0.724     | 3          | 0.576         |
| O-KU168297  | 418      | CTAACCCCTCAGAAGCTGCAT  |         |           |      |             |           | chr17:35124135-35124157   | 0.724     | 3          | 0.576         |
| A1-AB253422 | 417      | GCCAAAGCCCTCAGATGCTGCA |         |           |      |             |           | chr17:54454451-54454473   | 0.753     | 4          | 0.695         |
| D-M22639    | 417      | CTAACCCCTCAGATGCTGCA   |         |           |      |             |           | chr7:114526254-114526276  | 0.779     | 4          | 0.691         |
| G-AF196747  | 418      | CTAACCCCTCAGAAGCTGCAT  |         |           |      |             |           | chr17:35124135-35124157   | 0.724     | 3          | 0.576         |
| O-KU168282  | 417      | GCTAACCCCTCAGATGCTGCA  |         |           |      |             |           | chr7:114526254-114526276  | 0.779     | 4          | 0.691         |
| G-KU168277  | 477      | TAGACCAGATTTGAGCCTGG   |         |           |      |             |           | chr19:43234740-43234762   | 0.717     | 4          | 0.608         |
| G-KU168277  | 477      | TAGACCAGATTTGAGCCTGG   |         |           |      |             |           | chr19:43259950-43259972   | 0.717     | 4          | 0.608         |
| G-AF196748  | 477      | TAGACCAGATTTGAGCCTGG   |         |           |      |             |           | chr19:43234740-43234762   | 0.717     | 4          | 0.608         |
| G-AF196748  | 477      | TAGACCAGATTTGAGCCTGG   |         |           |      |             |           | chr19:43259950-43259972   | 0.717     | 4          | 0.608         |
| G-KU168302  | 477      | TAGACCAGATTTGAGCCTGG   |         |           |      |             |           | chr19:43234740-43234762   | 0.717     | 4          | 0.608         |
| G-KU168302  | 477      | TAGACCAGATTTGAGCCTGG   |         |           |      |             |           | chr19:43259950-43259972   | 0.717     | 4          | 0.608         |
| O-KU168298  | 479      | AATCAGGCTCAGCCCGGGA    |         |           |      |             |           | chr19:1948101-1948123     | 0.714     | 4          | 0.532         |
| A1-AF196742 | 479      | GACCAGATAGAGCCCGGAG    |         |           |      |             |           | chr1:194703942-194703964  | 0.933     | 4          | 0.583         |
| C-KC156124  | 477      | TAGACCAGATTTGAGCCTGG   |         |           |      |             |           | chr19:43234740-43234762   | 0.717     | 4          | 0.608         |
| C-KC156124  | 477      | TAGACCAGATTTGAGCCTGG   |         |           |      |             |           | chr19:43259950-43259972   | 0.717     | 4          | 0.608         |
| F1-AF196763 | 477      | TAGACCAGATTTGAGCCTGG   |         |           |      |             |           | chr19:43234740-43234762   | 0.717     | 4          | 0.608         |
| F1-AF196763 | 477      | TAGACCAGATTTGAGCCTGG   |         |           |      |             |           | chr19:43259950-43259972   | 0.717     | 4          | 0.608         |
| G-KU168277  | 500      | CTCTCTGCTAGCAAGGGAA    |         |           |      |             |           | chr8:94190055-94190077    | 0.809     | 4          | 0.812         |
| C-KC156124  | 503      | TCTGGCCATCTAGAGAACC    |         |           |      |             |           | chr10:133521808-133521830 | 0.836     | 3          | 0.684         |
| G-AF196747  | 500      | CTCTCTGCTAGCAGGGGAA    |         |           |      |             |           | chr7:78117028-78117050    | 0.867     | 2          | 0.840         |
| O-AY623602  | 546      | TGCTTTTGAGTGAGAGCAG    |         |           |      |             |           | chr2:188927750-188927772  | 0.751     | 2          | 0.681         |
| B-AB731663  | 544      | TGCTCTGAGTGCTTAAAG     | TRUE    |           |      |             |           | chr7:130035972-130035994  | 0.700     | 4          | 0.584         |
| A1-AF196742 | 600      | AGAGATACCTCAGACCAATG   | TRUE    |           |      |             |           | chr12:109366191-109366213 | 0.738     | 4          | 0.645         |
| B-AB731663  | 607      | CCTCAGACCAATTAAGTCAG   |         |           |      | TRUE        | CHP2_1    | chr16:23754470-23754492   | 0.750     | 3          | 0.566         |
|             |          |                        |         |           |      |             | CHP2_2    |                           |           |            |               |
| C-KC156213  | 600      | AGAGATCCCTCAGATCCATT   | TRUE    |           |      |             |           | chr10:22174409-22174431   | 0.750     | 2          | 0.598         |
| C-KC156213  | 600      | AGAGATCCCTCAGATCCATT   | TRUE    |           |      |             |           | chr15:77144670-77144692   | 0.750     | 2          | 0.598         |
| C-KC156213  | 600      | AGAGATCCCTCAGATCCATT   |         |           |      |             |           | chr1:75649945-75649967    | 0.750     | 2          | 0.598         |
| C-KC156213  | 600      | AGAGATCCCTCAGATCCATT   |         |           |      |             |           | chr4:71964816-71964838    | 0.750     | 2          | 0.559         |
| C-KC156213  | 600      | AGAGATCCCTCAGATCCATT   | TRUE    |           |      |             |           | chr14:60114158-60114180   | 0.750     | 3          | 0.665         |
